# Supplementary material for: IDEIS: a tool to identify PTPRC/CD45 isoforms from single-cell transcriptomic data
Source: Front Immunol. 2024 Oct 9;15:1446931. doi: 10.3389/fimmu.2024.1446931 (PMC11496083; doi:10.3389/fimmu.2024.1446931)
Supplement: Supplementary file 2 [file Table1.xlsx]

## Sheet: Data specification
	GSE187515	GSE212998	GSE155006	PRJEB40376
Authors	Collora et al.	Yu et al.	Mogilenko et al.	Lawlor et al.
Citation	Single-cell multiomics reveals persistence of HIV-1 in expanded cytotoxic T cell clones	Engineered cell entry links receptor biology with single-cell genomics	Comprehensive Profiling of an Aging Immune System Reveals Clonal GZMK+ CD8+ T Cells as Conserved Hallmark of Inflammaging	Single Cell Analysis of Blood Mononuclear Cells Stimulated Through Either LPS or Anti-CD3 and Anti-CD28
PMID	35320704	36516854	33271118	33815388
Database	GEO NCBI	GEO NCBI	GEO NCBI (BAM from ENA)	ENA
Species	Homo Sapiens	Homo Sapiens	Mus Musculus	Homo Sapiens
Type of used data	FASTQ	FASTQ	BAM + Count matrix	FASTQ
Cell types	CD8+ Healthy Controls	CD4+ CMV-seropositive patients	CD45+ Murine PBMC	Human PBMC
Kit for Gene Expression	Chromium Next GEM Single Cell 5' Library & Gel Bead Kit v1.1, 16 rxns PN-1000165	Chromium Next GEM Single Cell 5' Kit v2, 4 rxns PN-1000265	Chromium Single Cell 5' Reagent Kit	Chromium Single Cell 3' Library & Gel Bead Kit v2
Kit for Antibody Capture	Chromium Single Cell 5' Feature Barcode Library Kit, 16 rxns PN-1000080	5' Feature Barcode Kit, 16 rxns PN-1000256	N/A	Chromium Single Cell 3' Library & Gel Bead Kit v2 (CITE-seq Antibodies with supplemental steps in protocol)
Mapped CITE-seq Antibodies (in this paper)	CD45RA, CD45RO,CD3,CD4,CD8	CD45RA, CD45RO	N/A (obtained from count matrix)	CD45RA, CD45RO, CD3, CD4, CD8A, CD79B, CD14, CD16, CD56, CD19, CD20, CD11C, CD28, Baseline, LPS, Anti-CD3-CD28
Reference	Cellranger-GRCh38-3.0.0	Ensembl GRCh38 v102	N/A	Ensembl GRCh38 v102
Mapping software	Cell Ranger 3.0.2	Cell Ranger 5.0.1	N/A	Cell Ranger 5.0.1
Final data cell count	35965	26836	33794	55283
